# Supplementary material for: Biomarker Discovery for Immunotherapy of Pituitary Adenomas: Enhanced Robustness and Prediction Ability by Modern Computational Tools
Source: Int J Mol Sci. 2019 Jan 3;20(1):151. doi: 10.3390/ijms20010151 (PMC6337483; doi:10.3390/ijms20010151)
Supplement: Supplementary file 1 [file ijms-20-00151-s001.pdf]

**Supplementary Information for:**

**Biomarker Discovery for Immunotherapy of Pituitary Adenomas: Enhanced Robustness and Prediction Ability by Modern Computational Tools**

Qingxia YANG<sup>1,2</sup>, Yunxia WANG<sup>2</sup>, Song ZHANG<sup>2</sup>, Jing TANG<sup>1,2</sup>, Fengcheng LI<sup>2</sup>, Jiayi YIN<sup>2</sup>, Yi LI<sup>2</sup>,  
Jianbo FU<sup>2</sup>, Bo LI<sup>1</sup>, Yongchao LUO<sup>2</sup>, Weiwei XUE<sup>1,\*</sup> and Feng ZHU<sup>1,2,\*</sup>

<sup>1</sup>Innovative Drug Research and Bioinformatics Group, School of Pharmaceutical Sciences, Chongqing University, Chongqing 401331, China

<sup>2</sup>Innovative Drug Research and Bioinformatics Group, College of Pharmaceutical Sciences, Zhejiang University, Hangzhou 310058, China

\* Corresponding author: Prof. Feng ZHU ([zhufeng@zju.edu.cn](mailto:zhufeng@zju.edu.cn); [prof.zhufeng@gmail.com](mailto:prof.zhufeng@gmail.com))

**Supplementary Table 1.** Relevance between PA and the top-ranked (top-5 up & another top-5 down regulated) DEGs identified in this study confirmed by published literatures. N.A.: not available.

| Gene Entrez                                     | Gene Symbol | LogFC  | <i>p</i> -value | Relevance between the Identified DEGs and PA Confirmed by the Comprehensive Literature Reviews                          |
|-------------------------------------------------|-------------|--------|-----------------|-------------------------------------------------------------------------------------------------------------------------|
| <b>A: Strategy of Single Dataset (GSE51618)</b> |             |        |                 |                                                                                                                         |
| 4435                                            | CITED1      | 2.97   | 8.79E-03        | N.A.                                                                                                                    |
| 1191                                            | CLU         | 2.91   | 1.13E-02        | CLU expression in pituitary adenomas was found significantly higher than in non-neoplastic adenohypophyses <sup>1</sup> |
| 1442                                            | CSH1        | -10.29 | 1.72E-06        | N.A.                                                                                                                    |
| 1443                                            | CSH2        | -11.09 | 4.12E-07        | N.A.                                                                                                                    |
| 1444                                            | CSHL1       | -10.39 | 4.13E-08        | N.A.                                                                                                                    |
| 8788                                            | DLK1        | -9.29  | 4.15E-05        | DLK1 expression was reduced 2500-fold in nonfunctioning pituitary adenomas, compared with normal pituitary <sup>2</sup> |
| 56884                                           | FSTL5       | 3.25   | 1.23E-02        | N.A.                                                                                                                    |
| 2688                                            | GH1         | -11.17 | 1.71E-06        | GH-immunoreactivity was detected in most adenoma cells in the cases of unusual chromophobic adenomas <sup>3</sup>       |
| 3006                                            | HIST1H1C    | 2.87   | 4.06E-02        | N.A.                                                                                                                    |
| 140679                                          | SLC32A1     | 3.20   | 3.59E-04        | N.A.                                                                                                                    |
| <b>B: Strategy of Single Dataset (GSE26966)</b> |             |        |                 |                                                                                                                         |
| 158763                                          | ARHGAP36    | -7.60  | 2.21E-09        | N.A.                                                                                                                    |
| 339479                                          | BRINP3      | 4.84   | 1.20E-05        | BRINP3 was overexpressed in pituitary adenomas, compared with the normal people <sup>4</sup>                            |
| 389073                                          | C2orf80     | 4.81   | 2.12E-04        | N.A.                                                                                                                    |
| 1442                                            | CSH1        | -8.28  | 3.15E-25        | N.A.                                                                                                                    |

|                                                                                                |         |       |          |                                                                                                                               |
|------------------------------------------------------------------------------------------------|---------|-------|----------|-------------------------------------------------------------------------------------------------------------------------------|
| 79695                                                                                          | GALNT12 | 4.08  | 3.59E-07 | N.A.                                                                                                                          |
| 2688                                                                                           | GH1     | -9.71 | 1.46E-16 | It was showed a faint GH1-immunoreactivity in pituitary adenomas <sup>3</sup>                                                 |
| 5443                                                                                           | POMC    | -8.00 | 1.00E-17 | In silent subtype 2 and 3 pituitary adenomas, POMC had a diffuse low level or was absent, compared to the normal <sup>5</sup> |
| 5617                                                                                           | PRL     | -7.33 | 1.49E-07 | PRL gene expression was rare pituitary adenomas <sup>6</sup>                                                                  |
| 201780                                                                                         | SLC10A4 | 4.17  | 7.53E-06 | N.A.                                                                                                                          |
| 91752                                                                                          | ZNF804A | 4.91  | 3.36E-09 | N.A.                                                                                                                          |
| C: DDI Strategy Integrating Five Datasets (GSE22812, GSE26966, GSE4237, GSE46311 and GSE51618) |         |       |          |                                                                                                                               |
| 23305                                                                                          | ACSL6   | 0.91  | 3.51E-03 | N.A.                                                                                                                          |
| 1056                                                                                           | CEL     | -2.22 | 9.21E-10 | CEL expression was lacking in PRL cells pituitary adenomas, which is different from the normal pituitary <sup>7</sup>         |
| 1641                                                                                           | DCX     | 0.91  | 6.76E-04 | DCX expression was positively correlated with N-cadherin, which was increased in pituitary adenomas <sup>8,9</sup>            |
| 51083                                                                                          | GAL     | -2.69 | 4.22E-21 | Different from normal pituitary, GAL was rarely expressed in somatotroph adenomas and prolactinomas <sup>10</sup>             |
| 29899                                                                                          | GPSM2   | 0.91  | 1.73E-02 | PA pathogenesis is regulated by PI3K/AKT, which is the key pathway activated by GPSM2 during tumor growth <sup>11,12</sup>    |
| 3240                                                                                           | HP      | -2.21 | 1.06E-09 | The levels of five isoforms of HP were significantly decreased after GH substitution in PA patients <sup>13</sup>             |
| 5149                                                                                           | PDE6H   | 0.89  | 1.67E-02 | N.A.                                                                                                                          |
| 5443                                                                                           | POMC    | -3.85 | 2.79E-18 | In silent subtype 2 and 3 pituitary adenomas, POMC had a diffuse low level or was absent, compared to the normal <sup>5</sup> |
| 55752                                                                                          | SEPT11  | 0.87  | 1.13E-02 | N.A.                                                                                                                          |
| 7252                                                                                           | TSHB    | -3.26 | 6.65E-16 | The mRNA expression of TSHB was absent in most PA patients <sup>14</sup>                                                      |

**Supplementary Table 2.** Relevance between PA and the top-10 KEGG pathways identified here confirmed by published literatures. N.A.: not available.

| KEGG Pathway                                    | <i>p</i> -value | Relevance between SCZ and the Enriched Pathways Confirmed by the Comprehensive Literature Reviews                       |
|-------------------------------------------------|-----------------|-------------------------------------------------------------------------------------------------------------------------|
| <b>A: Strategy of Single Dataset (GSE51618)</b> |                 |                                                                                                                         |
| Alzheimer's disease                             | 2.00E-12        | N.A.                                                                                                                    |
| Oxidative phosphorylation                       | 1.96E-09        | Oxidative phosphorylation is revealed as the significant pathway in human pituitary adenoma by DEP data <sup>15</sup>   |
| Huntington's disease                            | 8.43E-09        | N.A.                                                                                                                    |
| Phosphatidylinositol signaling system           | 1.96E-08        | Phosphatidylinositol signaling system was found to be disturbed in pituitary tumors <sup>16</sup>                       |
| Oocyte meiosis                                  | 4.60E-08        | Differentially expression genes in pituitary gonadotroph adenomas were enriched in oocyte meiosis pathway <sup>17</sup> |
| Parkinson's disease                             | 9.81E-08        | N.A.                                                                                                                    |
| Citrate cycle/TCA cycle                         | 9.81E-08        | N.A.                                                                                                                    |
| Pathways in cancer                              | 1.54E-07        | N.A.                                                                                                                    |
| Axon guidance                                   | 2.34E-07        | N.A.                                                                                                                    |
| Focal adhesion                                  | 3.39E-07        | N.A.                                                                                                                    |
| <b>B: Strategy of Single Dataset (GSE26966)</b> |                 |                                                                                                                         |
| MAPK signaling pathway                          | 2.57E-10        | MAPK-signaling abnormality was demonstrated to be significantly associated with a pituitary adenoma <sup>15</sup>       |
| Pathways in cancer                              | 3.74E-10        | N.A.                                                                                                                    |
| Alzheimer's disease                             | 2.74E-08        | N.A.                                                                                                                    |
| Axon guidance                                   | 3.69E-07        | N.A.                                                                                                                    |

|                                                                                                       |          |                                                                                                                                  |
|-------------------------------------------------------------------------------------------------------|----------|----------------------------------------------------------------------------------------------------------------------------------|
| DNA replication                                                                                       | 5.26E-07 | N.A.                                                                                                                             |
| Cardiac muscle contraction                                                                            | 5.26E-07 | Cardiac muscle contraction is found to be significantly enriched pathway in pituitary adenoma <sup>18</sup>                      |
| Endocytosis                                                                                           | 1.32E-06 | Among pituitary adenoma, clathrin- and caveolar-mediated endocytosis were statistically significant pathways <sup>19</sup>       |
| Huntington's disease                                                                                  | 1.51E-06 | N.A.                                                                                                                             |
| Cell cycle                                                                                            | 2.22E-06 | Pathogenetic mechanisms of pituitary tumorigenesis is genetic or epigenetic and result in cell cycle dysregulation <sup>20</sup> |
| Adipocytokine signaling pathway                                                                       | 2.22E-06 | N.A.                                                                                                                             |
| <b>C: DDI Strategy Integrating Five Datasets (GSE22812, GSE26966, GSE4237, GSE46311 and GSE51618)</b> |          |                                                                                                                                  |
| TGF-beta signaling pathway                                                                            | 2.83E-06 | TGF-beta signaling pathway was significantly enriched for the genes of plurihormonal pituitary adenomas <sup>21</sup>            |
| Ribosome                                                                                              | 2.83E-06 | Genes encoding ribosomal proteins were under-expressed in GH-secreting pituitary adenomas <sup>22</sup>                          |
| MAPK signaling pathway                                                                                | 2.83E-06 | MAPK-signaling abnormality was significantly associated with pituitary adenoma <sup>15</sup>                                     |
| Complement and coagulation cascades                                                                   | 4.15E-06 | Genes in complement and coagulation cascades were upregulated in high MGMT expressing pituitary adenomas <sup>23</sup>           |
| Pathways in cancer                                                                                    | 2.08E-05 | N.A.                                                                                                                             |
| Cell cycle                                                                                            | 3.28E-05 | Pathogenetic mechanisms of pituitary tumorigenesis is genetic or epigenetic and result in cell cycle dysregulation <sup>20</sup> |
| P53 signaling pathway                                                                                 | 3.87E-05 | P53 signaling pathway plays an important role in tumorigenesis and progression of plurihormonal pituitary adenomas <sup>21</sup> |
| Axon guidance                                                                                         | 2.49E-04 | N.A.                                                                                                                             |
| PPAR signaling pathway                                                                                | 4.23E-04 | N.A.                                                                                                                             |
| Leukocyte transendothelial migration                                                                  | 9.45E-04 | Leukocyte transendothelial migration was found to be an important pathway in pituitary adenomas <sup>24</sup>                    |

**Supplementary Table 3.** Relevance between PA and the top-10 GO biological processes (BPs) identified here confirmed by literatures. N.A.: not available.

| GO Biological Process                           | p-value  | Relevance between PA and the Enriched GO BPs Confirmed by the Comprehensive Literature Reviews                                                                                              |
|-------------------------------------------------|----------|---------------------------------------------------------------------------------------------------------------------------------------------------------------------------------------------|
| <b>A: Strategy of Single Dataset (GSE51618)</b> |          |                                                                                                                                                                                             |
| Small molecule metabolic process                | 9.39E-41 | N.A.                                                                                                                                                                                        |
| Neurogenesis                                    | 2.53E-37 | N.A.                                                                                                                                                                                        |
| Intracellular signal transduction               | 4.72E-36 | Raf/MEK/ERK signalling has been considered to be one of the major and central intracellular signal transduction pathways in pituitary adenomas aetiology <sup>25</sup>                      |
| Protein complex subunit organization            | 4.72E-36 | Interleukin 4 receptor complex (including IL-4Ralpha, IL-13Ralpha1 and IL-2Rgamma chains) was overexpressed in invasive pituitary adenomas <sup>26</sup>                                    |
| Regulation of protein modification process      | 4.72E-36 | DNMT3b, which generated 5-methylcytosine by adding a methyl group directly to a cytosine base, was upregulated in PAs via histone modification <sup>27</sup>                                |
| Regulation of transport                         | 2.71E-35 | The miRNAs microarray results of GO analysis indicated positive regulation of sodium ion transport <sup>28</sup>                                                                            |
| Phosphate containing compound metabolic process | 2.47E-34 | N.A.                                                                                                                                                                                        |
| Positive regulation of molecular function       | 3.23E-34 | N.A.                                                                                                                                                                                        |
| Response to endogenous stimulus                 | 6.87E-34 | The cellular Ca <sup>2+</sup> transport was associated with stimulus-secretion coupling in prolactin producing rat pituitary adenoma cells <sup>29</sup>                                    |
| Regulation of phosphorus metabolic process      | 2.59E-33 | N.A.                                                                                                                                                                                        |
| <b>B: Strategy of Single Dataset (GSE26966)</b> |          |                                                                                                                                                                                             |
| Regulation of transport                         | 7.33E-74 | The miRNAs microarray results of GO analysis indicated positive regulation of sodium ion transport <sup>28</sup>                                                                            |
| Neurogenesis                                    | 7.9E-73  | N.A.                                                                                                                                                                                        |
| Cellular response to organic substance          | 1.62E-71 | The results of the GO analysis from normal pituitary and PA tissues indicated the functions of the downregulated genes were associated with the response to organic substance <sup>30</sup> |
| Response to oxygen containing compound          | 2.47E-70 | N.A.                                                                                                                                                                                        |

|                                                                                                       |          |                                                                                                                                                                                                 |
|-------------------------------------------------------------------------------------------------------|----------|-------------------------------------------------------------------------------------------------------------------------------------------------------------------------------------------------|
| Regulation of multicellular organismal development                                                    | 2.63E-69 | N.A.                                                                                                                                                                                            |
| Regulation of cell differentiation                                                                    | 3.3E-69  | Epigenetic chromatin structures were involved in regulation of the differentiation of pituitary adenomas <sup>31</sup>                                                                          |
| Intracellular signal transduction                                                                     | 4.11E-69 | The Raf/MEK/ERK signaling has been considered to be one of the major and central intracellular signal transduction pathways in pituitary adenomas aetiology <sup>25</sup>                       |
| Tissue development                                                                                    | 6.09E-67 | N.A.                                                                                                                                                                                            |
| Small molecule metabolic process                                                                      | 2.29E-66 | N.A.                                                                                                                                                                                            |
| Response to endogenous stimulus                                                                       | 8.85E-66 | The cellular Ca <sup>2+</sup> transport was associated with stimulus-secretion coupling in prolactin producing rat pituitary adenoma cells <sup>29</sup>                                        |
| <b>C: DDI Strategy Integrating Five Datasets (GSE22812, GSE26966, GSE4237, GSE46311 and GSE51618)</b> |          |                                                                                                                                                                                                 |
| Regulation of cell proliferation                                                                      | 2.72E-38 | Immunostaining assay indicated AIB1 participated in the regulation of proliferation of tumoral cells in prolactinomas <sup>32</sup>                                                             |
| Response to endogenous stimulus                                                                       | 2.62E-31 | The cellular Ca <sup>2+</sup> transport was associated with stimulus-secretion coupling in prolactin producing rat pituitary adenoma cells <sup>29</sup>                                        |
| Response to external stimulus                                                                         | 5.24E-31 | In vitro leptin stimulation of pituitary tumors caused stimulation of FSH and alpha-subunit secretion from a non-functioning adenoma and TSH secretion from a somatotroph adenoma <sup>33</sup> |
| Tissue development                                                                                    | 1.2E-28  | N.A.                                                                                                                                                                                            |
| Positive regulation of response to stimulus                                                           | 3.64E-27 | The results of the GO analysis from blood samples from nine patients with PAs and seven healthy controls indicated the positive regulation of response to stimulus <sup>34</sup>                |
| Positive regulation of cell communication                                                             | 6.54E-27 | Interaction of TGF-beta and b-FGF facilitated the communication between lactotropes and folliculo-stellate cells in prolactinoma formation <sup>35</sup>                                        |
| Regulation of cell death                                                                              | 2.57E-26 | N.A.                                                                                                                                                                                            |
| Cellular response to organic substance                                                                | 1.84E-25 | The results of the GO analysis from normal pituitary and PA tissues indicated the functions of the downregulated genes were associated with the response to organic substance <sup>30</sup>     |
| Response to oxygen containing compound                                                                | 1.84E-25 | N.A.                                                                                                                                                                                            |
| Regulation of cell differentiation                                                                    | 2.49E-25 | Epigenetic chromatin structures were involved in regulation of the differentiation of pituitary adenomas <sup>31</sup>                                                                          |

**Supplementary Table 4.** Relevance between PA and the top-10 GO molecular functions (MFs) identified here confirmed by literatures. N.A.: not available.

| GO Molecular Function                           | <i>p</i> -value | Relevance between PA and the Enriched GO MFs Confirmed by the Comprehensive Literature Reviews                                                            |
|-------------------------------------------------|-----------------|-----------------------------------------------------------------------------------------------------------------------------------------------------------|
| <b>A: Strategy of Single Dataset (GSE51618)</b> |                 |                                                                                                                                                           |
| Enzyme binding                                  | 2.26E-37        | N.A.                                                                                                                                                      |
| Protein dimerization activity                   | 1.48E-34        | N.A.                                                                                                                                                      |
| Macromolecular complex binding                  | 3.48E-34        | It has been shown that L-triiodothyronine can be bound with a macromolecular complex in pituitary tumor cells <sup>36</sup>                               |
| Identical protein binding                       | 3.67E-30        | N.A.                                                                                                                                                      |
| Receptor binding                                | 1.36E-29        | The research of nonfunctioning pituitary adenomas showed epidepride was specifically bound with D2 receptor <sup>37</sup>                                 |
| Ribonucleotide binding                          | 1.06E-28        | The significantly enriched GO term for molecular functions of DEGs between PAs and normal control tissues was guanyl ribonucleotide binding <sup>18</sup> |
| Transporter activity                            | 2.90E-22        | N.A.                                                                                                                                                      |
| Transmembrane transporter activity              | 4.62E-22        | N.A.                                                                                                                                                      |
| Molecular function regulator                    | 1.10E-21        | mTOR pathway regulators was significantly correlated with the invasion, staging, and tumor growth of pituitary adenomas <sup>38</sup>                     |
| Adenyl nucleotide binding                       | 2.78E-21        | N.A.                                                                                                                                                      |
| <b>B: Strategy of Single Dataset (GSE26966)</b> |                 |                                                                                                                                                           |
| Receptor binding                                | 1.15E-53        | The research of nonfunctioning pituitary adenomas showed epidepride was specifically bound with D2 receptor <sup>37</sup>                                 |
| Enzyme binding                                  | 1.15E-53        | N.A.                                                                                                                                                      |
| Transporter activity                            | 6.52E-46        | N.A.                                                                                                                                                      |
| Protein dimerization activity                   | 4.58E-45        | N.A.                                                                                                                                                      |

|                                    |          |                                                                                                                                                           |
|------------------------------------|----------|-----------------------------------------------------------------------------------------------------------------------------------------------------------|
| Molecular function regulator       | 3.07E-42 | mTOR pathway regulators was significantly correlated with the invasion, staging, and tumor growth of pituitary adenomas <sup>38</sup>                     |
| Macromolecular complex binding     | 7.40E-42 | It has been shown that L-triiodothyronine can be bound with a macromolecular complex in pituitary tumor cells <sup>36</sup>                               |
| Ribonucleotide binding             | 8.78E-42 | The significantly enriched GO term for molecular functions of DEGs between PAs and normal control tissues was guanyl ribonucleotide binding <sup>18</sup> |
| Transmembrane transporter activity | 1.67E-40 | N.A.                                                                                                                                                      |
| Identical protein binding          | 1.20E-38 | N.A.                                                                                                                                                      |
| Lipid binding                      | 1.17E-33 | N.A.                                                                                                                                                      |

#### C: DDI Strategy Integrating Five Datasets (GSE22812, GSE26966, GSE4237, GSE46311 and GSE51618)

|                                                    |          |                                                                                                                                                                     |
|----------------------------------------------------|----------|---------------------------------------------------------------------------------------------------------------------------------------------------------------------|
| Receptor binding                                   | 9.55E-20 | The research of nonfunctioning pituitary adenomas showed epidepride was specifically bound with D2 receptor <sup>37</sup>                                           |
| Identical protein binding                          | 4.58E-14 | N.A.                                                                                                                                                                |
| Macromolecular complex binding                     | 1.19E-12 | It has been shown that L-triiodothyronine can be bound with a macromolecular complex in pituitary tumor cells <sup>36</sup>                                         |
| Molecular function regulator                       | 1.22E-12 | mTOR pathway regulators was significantly correlated with the invasion, staging, and tumor growth of pituitary adenomas <sup>38</sup>                               |
| Ribonucleotide binding                             | 1.22E-12 | The significantly enriched GO term for molecular functions of DEGs between PAs and normal control tissues was guanyl ribonucleotide binding <sup>18</sup>           |
| Sulfur compound binding                            | 1.11E-11 | The compounds with polar sulfur functions retained the high binding affinity for the calf uterine estrogen receptor in pituitary tumor cells <sup>39,40</sup>       |
| Structural molecule activity                       | 1.11E-11 | N.A.                                                                                                                                                                |
| Nucleic acid binding transcription factor activity | 2.14E-11 | N.A.                                                                                                                                                                |
| Heparin binding                                    | 2.14E-11 | Heparin-binding secretory transforming gene overexpression in rat pituitary cells mediated lactotroph tumor growth and stimulates PRL transcription <sup>41</sup> . |
| Transcription factor binding                       | 2.14E-11 | N.A.                                                                                                                                                                |

## References:

- 1 A. I. Ekici; B. Eren; N. Turkmen; N. Comunoglu; R. Fedakar. Clusterin expression in non-neoplastic adenohypophyses and pituitary adenomas: cytoplasmic clusterin localization in adenohypophysis is related to aging. *Endocr Pathol.* 2008, 19(1): 47-53
- 2 P. Cheunsuchon; Y. Zhou; X. Zhang; H. Lee; W. Chen; Y. Nakayama; K. A. Rice; E. Tessa Hedley-Whyte; B. Swearingen; A. Klibanski. Silencing of the imprinted DLK1-MEG3 locus in human clinically nonfunctioning pituitary adenomas. *Am J Pathol.* 2011, 179(4): 2120-30
- 3 A. Yoneda; T. Sano; S. Yamada; A. Obari; Z. R. Qian; E. L. Wang; N. Inosita; E. Kudo. Pituitary adenomas that show a faint GH-immunoreactivity but lack fibrous body: Pit-1 adenoma with endocrinologically low activity. *Endocr Pathol.* 2010, 21(1): 40-7
- 4 L. Shorts-Cary; M. Xu; J. Ertel; B. K. Kleinschmidt-Demasters; K. Lillehei; I. Matsuoka; S. Nielsen-Preiss; M. E. Wierman. Bone morphogenetic protein and retinoic acid-inducible neural specific protein-3 is expressed in gonadotrope cell pituitary adenomas and induces proliferation, migration, and invasion. *Endocrinology.* 2007, 148(3): 967-75
- 5 L. Stefaneanu; K. Kovacs; E. Horvath; R. V. Lloyd. In situ hybridization study of pro-opiomelanocortin (POMC) gene expression in human pituitary corticotrophs and their adenomas. *Virchows Arch A Pathol Anat Histopathol.* 1991, 419(2): 107-13
- 6 E. Baz; W. Saeger; H. Uhlig; S. Fehr; D. K. Ludecke. HGH, PRL and beta HCG/beta LH gene expression in clinically inactive pituitary adenomas detected by in situ hybridization. *Virchows Arch A Pathol Anat Histopathol.* 1991, 418(5): 405-10
- 7 S. La Rosa; D. Vigetti; C. Placidi; G. Finzi; S. Uccella; M. Clerici; B. Bartolini; I. Carnevali; M. Losa; C. Capella. Localization of carboxyl ester lipase in human pituitary gland and pituitary adenomas. *J Histochem Cytochem.* 2010, 58(10): 881-9
- 8 T. Ide; K. Uchida; K. Suzuki; Y. Kagawa; H. Nakayama. Expression of cell adhesion molecules and doublecortin in canine anaplastic meningiomas. *Vet Pathol.* 2011, 48(1): 292-301
- 9 K. Zhou; H. Jin; Y. Luo. Expression and significance of E-cadherin and beta-catenins in pituitary adenoma. *Int J Surg Pathol.* 2013, 21(4): 363-7
- 10 B. Leung; T. P. Iisma; K. C. Leung; Y. J. Hort; J. Turner; J. P. Sheehy; K. K. Ho. Galanin in human pituitary adenomas: frequency and clinical significance. *Clin Endocrinol (Oxf).* 2002, 56(3): 397-403
- 11 X. Q. He; Y. F. Zhang; J. J. Yu; Y. Y. Gan; N. N. Han; M. X. Zhang; W. Ge; J. J. Deng; Y. F. Zheng; X. M. Xu. High expression of G-protein signaling modulator 2 in hepatocellular carcinoma facilitates tumor growth and metastasis by activating the PI3K/AKT signaling pathway. *Tumour Biol.* 2017, 39(3): 1010428317695971
- 12 E. Monsalves; K. Juraschka; T. Tateno; S. Agnihotri; S. L. Asa; S. Ezzat; G. Zadeh. The PI3K/AKT/mTOR pathway in the pathophysiology and treatment of pituitary adenomas. *Endocr Relat Cancer.* 2014, 21(4): R331-44

- 13 D. Cruz-Topete; J. O. Jorgensen; B. Christensen; L. Sackmann-Sala; T. Krusenstjerna-Hafstrom; A. Jara; S. Okada; J. J. Kopchick. Identification of new biomarkers of low-dose GH replacement therapy in GH-deficient patients. *J Clin Endocrinol Metab.* 2011, 96(7): 2089-97
- 14 J. L. Jameson; A. Klibanski; P. M. Black; N. T. Zervas; C. M. Lindell; D. W. Hsu; E. C. Ridgway; J. F. Habener. Glycoprotein hormone genes are expressed in clinically nonfunctioning pituitary adenomas. *J Clin Invest.* 1987, 80(5): 1472-8
- 15 X. Zhan; D. M. Desiderio. Signaling pathway networks mined from human pituitary adenoma proteomics data. *BMC Med Genomics.* 2010, 313
- 16 T. Cai; J. Xiao; Z. F. Wang; Q. Liu; H. Wu; Y. Z. Qiu. Identification of differentially coexpressed genes in gonadotrope tumors and normal pituitary using bioinformatics methods. *Pathol Oncol Res.* 2014, 20(2): 375-80
- 17 Z. Hou; J. Yang; G. Wang; C. Wang; H. Zhang. Bioinformatic analysis of gene expression profiles of pituitary gonadotroph adenomas. *Oncol Lett.* 2018, 15(2): 1655-63
- 18 P. Zhao; W. Hu; H. Wang; S. Yu; C. Li; J. Bai; S. Gui; Y. Zhang. Identification of differentially expressed genes in pituitary adenomas by integrating analysis of microarray data. *Int J Endocrinol.* 2015, 2015164087
- 19 X. Zhan; X. Wang; D. M. Desiderio. Pituitary adenoma nitroproteomics: current status and perspectives. *Oxid Med Cell Longev.* 2013, 2013580710
- 20 S. Melmed. Pathogenesis of pituitary tumors. *Nat Rev Endocrinol.* 2011, 7(5): 257-66
- 21 Z. Jiang; S. Gui; Y. Zhang. Analysis of differential gene expression in plurihormonal pituitary adenomas using bead-based fiber-optic arrays. *J Neurooncol.* 2012, 108(3): 341-8
- 22 D. S. de Lima; C. S. Martins; B. M. Paixao; F. C. Amaral; L. M. Colli; F. P. Saggioro; L. Neder; H. R. Machado; A. R. dos Santos; D. G. Pinheiro; A. C. Moreira; W. A. Silva, Jr.; M. Castro. SAGE analysis highlights the putative role of underexpression of ribosomal proteins in GH-secreting pituitary adenomas. *Eur J Endocrinol.* 2012, 167(6): 759-68
- 23 A. McCormack; W. Kaplan; A. J. Gill; N. Little; R. Cook; B. Robinson; R. Clifton-Bligh. MGMT expression and pituitary tumours: relationship to tumour biology. *Pituitary.* 2013, 16(2): 208-19
- 24 C. Cao; W. Wang; C. Ma; P. Jiang. Computational analysis identifies invasion-associated genes in pituitary adenomas. *Mol Med Rep.* 2015, 12(2): 1977-82
- 25 Z. Suojun; W. Feng; G. Dongsheng; L. Ting. Targeting Raf/MEK/ERK pathway in pituitary adenomas. *Eur J Cancer.* 2012, 48(3): 389-95
- 26 L. Chen; Y. Liu; Y. Hou; Y. Kato; H. Sano; T. Kanno. Expression and structure of interleukin 4 receptor (IL-4R) complex in human invasive pituitary adenomas. *Neurosci Lett.* 2007, 417(1): 30-5
- 27 M. Pease; C. Ling; W. J. Mack; K. Wang; G. Zada. The role of epigenetic modification in tumorigenesis and progression of pituitary adenomas: a systematic review of the literature. *PLoS One.* 2013, 8(12): e82619

- 28 S. Wu; Y. Gu; Y. Huang; T. C. Wong; H. Ding; T. Liu; Y. Zhang; X. Zhang. Novel Biomarkers for Non-functioning Invasive Pituitary Adenomas were Identified by Using Analysis of microRNAs Expression Profile. *Biochem Genet.* 2017, 55(3): 253-67
- 29 J. G. Iversen; K. Sletholt; E. Haug; K. M. Gautvik. On the functional relationship between  $^{45}\text{Ca}^{2+}$  release and prolactin secretion in cultured rat pituitary tumour (GH3) cells. *Acta Physiol Scand.* 1986, 127(2): 249-55
- 30 W. Wang; Z. Xu; L. Fu; W. Liu; X. Li. Pathogenesis analysis of pituitary adenoma based on gene expression profiling. *Oncol Lett.* 2014, 8(6): 2423-30
- 31 T. Minematsu; S. Miyai; H. Kajiya; M. Suzuki; N. Sanno; S. Takekoshi; A. Teramoto; R. Y. Osamura. Recent progress in studies of pituitary tumor pathogenesis. *Endocrine.* 2005, 28(1): 37-41
- 32 J. Carretero; E. J. Blanco; M. Carretero; M. Carretero-Hernandez; M. J. Garcia-Barrado; M. C. Iglesias-Osma; D. J. Burks; J. Font de Mora. The expression of AIB1 correlates with cellular proliferation in human prolactinomas. *Ann Anat.* 2013, 195(3): 253-9
- 33 M. Korbonits; M. M. Chitnis; M. Gueorguiev; D. Norman; N. Rosenfelder; M. Suliman; T. H. Jones; K. Noonan; A. Fabbri; G. M. Besser; J. M. Burrin; A. B. Grossman. The release of leptin and its effect on hormone release from human pituitary adenomas. *Clin Endocrinol (Oxf).* 2001, 54(6): 781-9
- 34 W. Zhou; C. X. Ma; Y. Z. Xing; Z. Y. Yan. Identification of candidate target genes of pituitary adenomas based on the DNA microarray. *Mol Med Rep.* 2016, 13(3): 2182-6
- 35 D. K. Sarkar. Genesis of prolactinomas: studies using estrogen-treated animals. *Front Horm Res.* 2006, 35:32-49
- 36 J. Torresani; L. J. DeGroot. Triiodothyronine binding to liver nuclear solubilized proteins in vitro. *Endocrinology.* 1975, 96(5): 1201-9
- 37 W. Pirker; M. Riedl; A. Luger; T. Czech; K. Rossler; S. Asenbaum; P. Angelberger; J. Kornhuber; L. Deecke; I. Podreka; T. Brucke. Dopamine D2 receptor imaging in pituitary adenomas using iodine-123-epidepride and SPECT. *J Nucl Med.* 1996, 37(12): 1931-7
- 38 W. Jia; A. J. Sanders; G. Jia; X. Liu; R. Lu; W. G. Jiang. Expression of the mTOR pathway regulators in human pituitary adenomas indicates the clinical course. *Anticancer Res.* 2013, 33(8): 3123-31
- 39 C. Biberger; E. von Angerer. 2-Phenylindoles with sulfur containing side chains. Estrogen receptor affinity, antiestrogenic potency, and antitumor activity. *J Steroid Biochem Mol Biol.* 1996, 58(1): 31-43
- 40 C. J. Newton; T. Trapp; U. Pagotto; U. Renner; R. Buric; G. K. Stalla. The oestrogen receptor modulates growth of pituitary tumour cells in the absence of exogenous oestrogen. *J Mol Endocrinol.* 1994, 12(3): 303-12
- 41 I. Shimon; D. R. Hinton; M. H. Weiss; S. Melmed. Prolactinomas express human heparin-binding secretory transforming gene (hst) protein product: marker of tumour invasiveness. *Clin Endocrinol (Oxf).* 1998, 48(1): 23-9
